# Supplementary material for: Coastal extreme sea levels in the Caribbean Sea induced by tropical cyclones
Source: Copernicus journal article supplement (doi:10.5194/nhess-2022-120), 2022-04-19
Supplement: Supplementary file 1 [file nhess-2022-120-supplement.pdf]

# Coastal extreme sea levels in the Caribbean Sea induced by tropical cyclones

Ariadna Martín<sup>1</sup>, Angel Amores<sup>1</sup>, Alejandro Orfila<sup>1</sup>, Tim Toomey<sup>1</sup>, and Marta Marcos<sup>1,2</sup>

<sup>1</sup>Mediterranean Institute for Advanced Studies (UIB-CSIC), Spain

<sup>2</sup>Department of Physics, University of Balearic Islands, Spain

**Correspondence:** Marta Marcos (marta.marcos@uib.es)

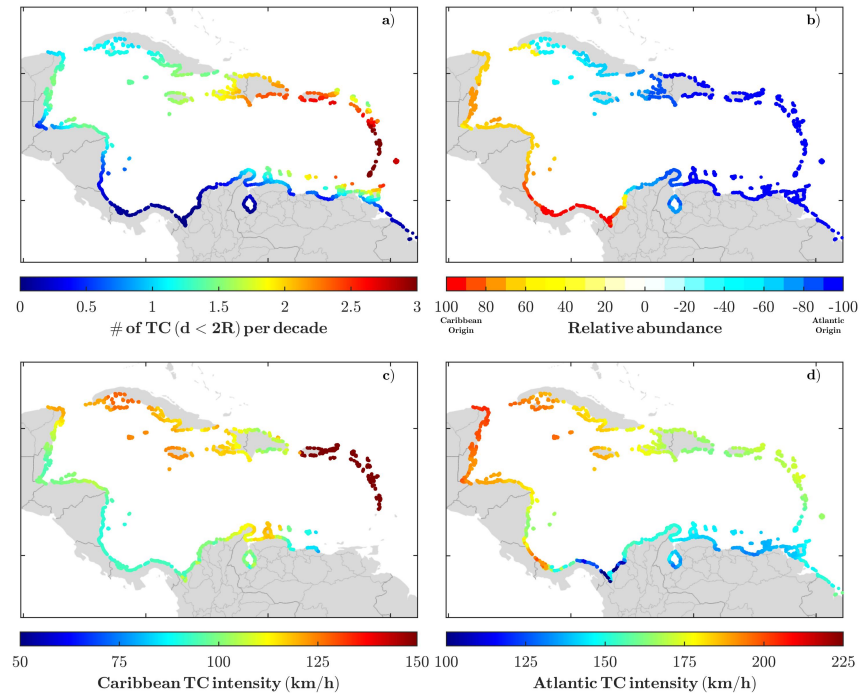

**Figure 1.** The same magnitudes as the Fig.3 is represented but for the total dataset (25494 TCs) of hurricanes that cross the Caribbean Sea.

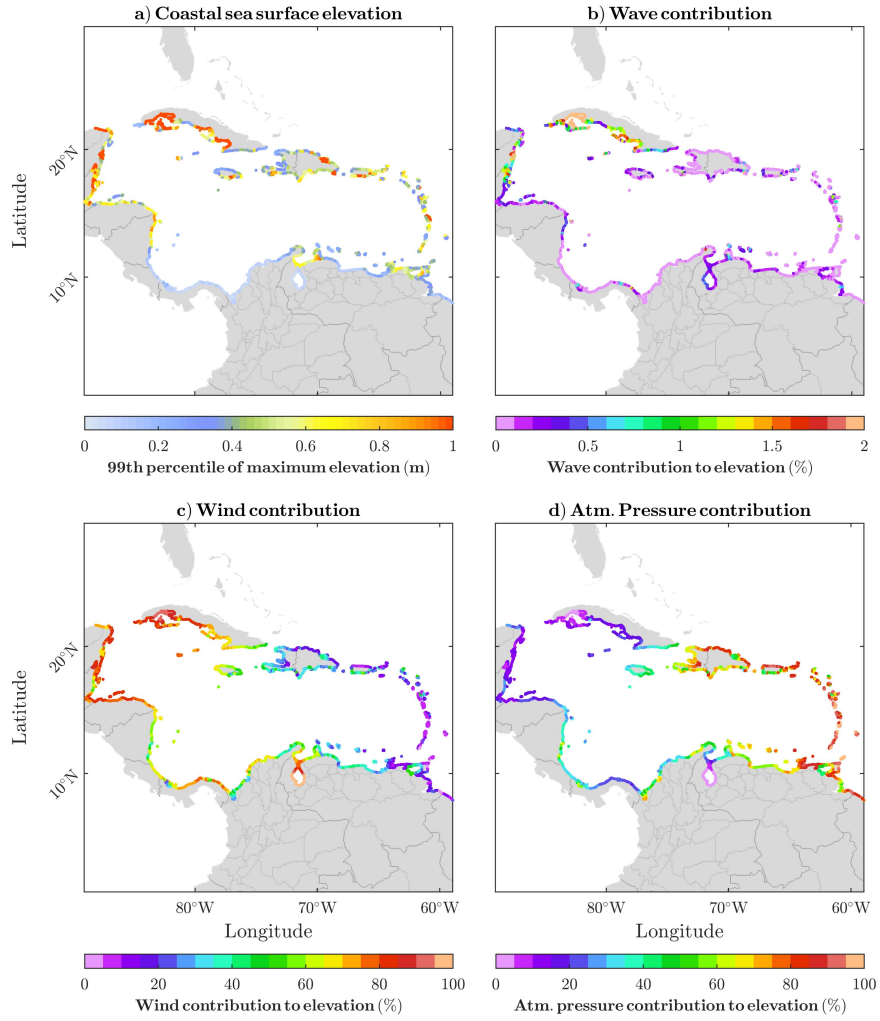

[h]

**Figure 2.** The same magnitude as the Fig.6 is represented, contributions are presented here in relative terms. Note that the colour scales for the wave setup is smaller (b).

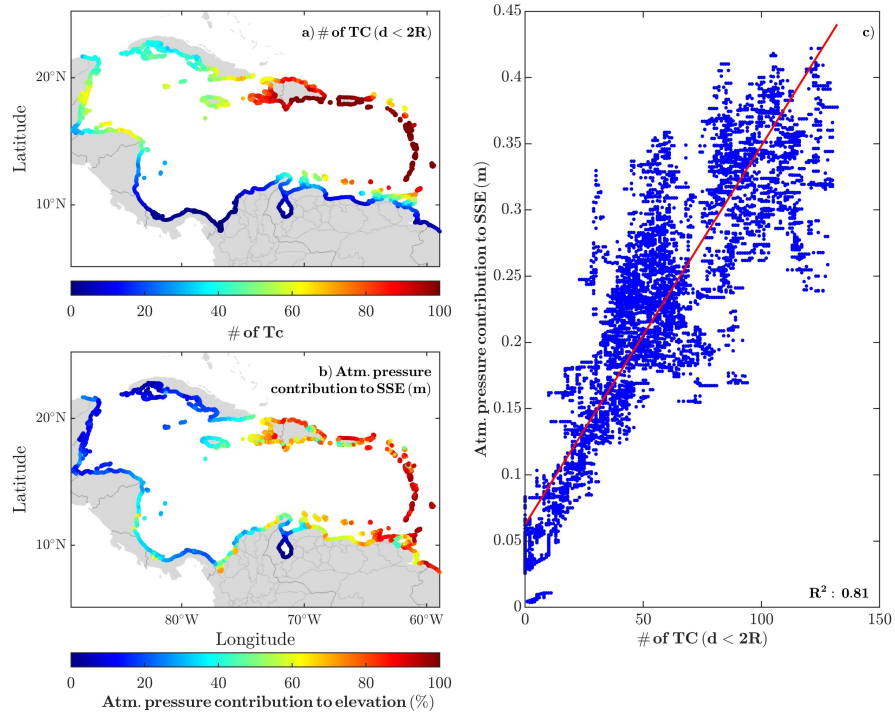

**Figure 3.** Effect of atmospheric pressure of the TCs that cross the Caribbean Sea. The top panel a) shows the number of hurricanes per decade affecting each coastline (that is, those that pass at a distance ( $d$ ) less than twice the radius of maximum speed ( $R$ ), as in Fig.3). Panel b) shows the contribution to SSE due to atmospheric pressure while panel c) shows the correlation between both panels.
